# Supplementary material
Source: publisher figshare collection journal article supplement (https://gsajournals.figshare.com/ndownloader/files/27005579)
Supplement: Supplementary file 1 [file 27005579]

## Sheet: Table S3
Table S3: Transcription factor enrichment analysis of suppressors and enhancers of fzo-1(tm1133)-induced UPRmt
	Transcription Factor	Human Ortholog	Motif	Adjusted P-value	Term Size	Intersection Size	Intersection
Suppressor	hlh-2:cnd-1	NEUROD1,4,6	NNNAACAKCTGTCNNN	3.35756e-13	224	5	WBGENE00012936,WBGENE00015525,WBGENE00013075,WBGENE00011311,WBGENE00000271
specific	blmp-1	PRDM1	RAAAGNGARAR	4.51946e-05	1429	25	WBGENE00004075,WBGENE00008990,WBGENE00194986,WBGENE00006700,WBGENE00000547,WBGENE00018776,WBGENE00019264,WBGENE00021073,WBGENE00015525,WBGENE00012245,WBGENE00020295,WBGENE00011408,WBGENE00004424,WBGENE00004433,WBGENE00004436,WBGENE00004456,WBGENE00004479,WBGENE00004497,WBGENE00006497,WBGENE00000410,WBGENE00003037,WBGENE00007012,WBGENE00006445,WBGENE00010435,WBGENE00006923
	efl-1	E2F4, E2F5	NNNNSGCGSGAAAWT	4.54291e-05	1258	23	WBGENE00000585,WBGENE00015676,WBGENE00004302,WBGENE00023497,WBGENE00002998,WBGENE00019767,WBGENE00016393,WBGENE00009006,WBGENE00010428,WBGENE00006700,WBGENE00006706,WBGENE00013160,WBGENE00012230,WBGENE00000479,WBGENE00011408,WBGENE00013109,WBGENE00004424,WBGENE00019275,WBGENE00004411,WBGENE00003037,WBGENE00000197,WBGENE00001336,WBGENE00016581
	pal-1	CDX1	GTAATWAA	0.000402057	1877	27	WBGENE00000200,WBGENE00000292,WBGENE00001493,WBGENE00016384,WBGENE00017746,WBGENE00014025,WBGENE00018409,WBGENE00004955,WBGENE00009006,WBGENE00006737,WBGENE00019264,WBGENE00012230,WBGENE00000796,WBGENE00003904,WBGENE00014165,WBGENE00004916,WBGENE00006964,WBGENE00013109,WBGENE00004426,WBGENE00004456,WBGENE00006497,WBGENE00017885,WBGENE00006390,WBGENE00006445,WBGENE00022375,WBGENE00009365,WBGENE000…
	hlh-2::hlh-19	TCF12 & ASCL4	NNNAMCAGSTGKYMNN	0.00119943	636	13	WBGENE00002090,WBGENE00003803,WBGENE00001879,WBGENE00012936,WBGENE00020549,WBGENE00006737,WBGENE00014172,WBGENE00015525,WBGENE00013075,WBGENE00011311,WBGENE00007018,WBGENE00010405,WBGENE00002083
	elt-3	GATA3,4	TCTTATCA	0.0200844	2252	25	WBGENE00001493,WBGENE00002090,WBGENE00002196,WBGENE00007703,WBGENE00010097,WBGENE00002079,WBGENE00010665,WBGENE00194986,WBGENE00010425,WBGENE00008149,WBGENE00020549,WBGENE00014172,WBGENE00015232,WBGENE00021899,WBGENE00004916,WBGENE00019323,WBGENE00015941,WBGENE00011408,WBGENE00017885,WBGENE00006386,WBGENE00010560,WBGENE00010760,WBGENE00017358,WBGENE00006923,WBGENE00021580
	hlh-11	TFAP4	NNNNATCAGCTGANNN	0.0321029	65	3	WBGENE00002190,WBGENE00016313,WBGENE00000937
'Shared'	ceh-48	ONECUT1,2,3	NNYCRATAN	1.11008e-62	12438	218	WBGENE00008266,WBGENE00000200,WBGENE00001130,WBGENE00001493,WBGENE00003777,WBGENE00006789,WBGENE00016311,WBGENE00016384,WBGENE00002090,WBGENE00002196,WBGENE00002190,WBGENE00004087,WBGENE00017746,WBGENE00009521,WBGENE00011306,WBGENE00000150,WBGENE00014025,WBGENE00000585,WBGENE00021784,WBGENE00001661,WBGENE00002074,WBGENE00002076,WBGENE00002077,WBGENE00015676,WBGENE00003788,WBGENE00003806,WBGENE000…
Suppressor	lin-14	n.a.	GAACRC	7.12481e-21	7240	114	WBGENE00000200,WBGENE00000292,WBGENE00000293,WBGENE00015927,WBGENE00016913,WBGENE00003777,WBGENE00016384,WBGENE00002196,WBGENE00002190,WBGENE00017746,WBGENE00009521,WBGENE00011306,WBGENE00012386,WBGENE00014025,WBGENE00000585,WBGENE00002074,WBGENE00002076,WBGENE00015676,WBGENE00043064,WBGENE00003788,WBGENE00019940,WBGENE00004075,WBGENE00008990,WBGENE00010097,WBGENE00006768,WBGENE00016990,WBGENE000…
	che-1	ZNF500, ZSCAN4	GAARCC	4.66717e-20	8001	119	WBGENE00008266,WBGENE00000200,WBGENE00001493,WBGENE00002053,WBGENE00016913,WBGENE00016384,WBGENE00002090,WBGENE00002190,WBGENE00012084,WBGENE00004087,WBGENE00009521,WBGENE00011306,WBGENE00011944,WBGENE00002045,WBGENE00002074,WBGENE00002077,WBGENE00003806,WBGENE00004075,WBGENE00004302,WBGENE00006565,WBGENE00015813,WBGENE00006768,WBGENE00002079,WBGENE00001937,WBGENE00002637,WBGENE00018409,WBGENE000…
	grh-1	GRHL1	ACYGGTTT	0.00162281	937	16	WBGENE00001661,WBGENE00001281,WBGENE00015811,WBGENE00000796,WBGENE00010325,WBGENE00021073,WBGENE00012676,WBGENE00004438,WBGENE00004441,WBGENE00004490,WBGENE00000271,WBGENE00016750,WBGENE00012950,WBGENE00015075,WBGENE00010508,WBGENE00017356
	lim-4	LHX6, 8	NNTAATTAR	0.0463257	2069	22	WBGENE00002053,WBGENE00016913,WBGENE00016384,WBGENE00000150,WBGENE00043064,WBGENE00019940,WBGENE00005007,WBGENE00012936,WBGENE00019460,WBGENE00006700,WBGENE00004916,WBGENE00006964,WBGENE00004424,WBGENE00004456,WBGENE00004497,WBGENE00009672,WBGENE00003037,WBGENE00007012,WBGENE00006386,WBGENE00006542,WBGENE00008428,WBGENE00010508
Enhancer	skn-1	NFE2, NFE2L1,2,3	AAAATGATGACAAWN	0.0496646	493	4	WBGENE00000181,WBGENE00001486,WBGENE00021829,WBGENE00011100
specific	hlh-29	n.a.	NNNNCACGCRTGKYNNN	0.0496646	256	3	WBGENE00009246,WBGENE00012375,WBGENE00009353
	vab-7	EVX2	CTAATTAA	0.0496646	1071	6	WBGENE00015734,WBGENE00008514,WBGENE00001503,WBGENE00003064,WBGENE00011875,WBGENE00013237
'Shared'	ceh-48	ONECUT1,2,3	NNYCRATAN	3.35756e-13	12438	57	WBGENE00000181,WBGENE00000210,WBGENE00007113,WBGENE00015021,WBGENE00016119,WBGENE00016442,WBGENE00008147,WBGENE00016978,WBGENE00015734,WBGENE00010437,WBGENE00007221,WBGENE00010303,WBGENE00001338,WBGENE00017348,WBGENE00000263,WBGENE00009138,WBGENE00017923,WBGENE00018422,WBGENE00009712,WBGENE00009771,WBGENE00001486,WBGENE00001495,WBGENE00001503,WBGENE00009246,WBGENE00001983,WBGENE00017982,WBGENE000…
Enhancer	lin-14	n.a.	GAACRC	7.78827e-05	7240	30	WBGENE00000210,WBGENE00015021,WBGENE00016119,WBGENE00016117,WBGENE00016442,WBGENE00008236,WBGENE00016978,WBGENE00007221,WBGENE00010303,WBGENE00008514,WBGENE00018422,WBGENE00001495,WBGENE00001503,WBGENE00001975,WBGENE00001983,WBGENE00010279,WBGENE00003065,WBGENE00021829,WBGENE00012645,WBGENE00020717,WBGENE00012244,WBGENE00015487,WBGENE00020718,WBGENE00007859,WBGENE00007215,WBGENE00006946,WBGENE000…
	che-1	ZNF500, ZSCAN4	GAARCC	0.00110749	8001	29	WBGENE00000210,WBGENE00007444,WBGENE00008147,WBGENE00008236,WBGENE00008364,WBGENE00001338,WBGENE00001155,WBGENE00017923,WBGENE00009305,WBGENE00009712,WBGENE00001495,WBGENE00001503,WBGENE00009246,WBGENE00001983,WBGENE00010465,WBGENE00003064,WBGENE00003065,WBGENE00021829,WBGENE00007712,WBGENE00012244,WBGENE00020718,WBGENE00011123,WBGENE00020099,WBGENE00011897,WBGENE00015391,WBGENE00009353,WBGENE000…
	grh-1	GRHL1	ACYGGTTT	0.00212194	937	8	WBGENE00015021,WBGENE00007444,WBGENE00007221,WBGENE00001338,WBGENE00009712,WBGENE00009246,WBGENE00012244,WBGENE00022336
	lim-4	LHX6, 8	NNTAATTAR	0.0496646	2069	9	WBGENE00016442,WBGENE00015734,WBGENE00008514,WBGENE00001503,WBGENE00003064,WBGENE00019333,WBGENE00006946,WBGENE00011875,WBGENE00013237
R = A or G
Y = C or T
W = A or T
S = G or C
M = A or C
K = G or T
H = A or T or C
B = C or G or T
V = A or C or G
D = A or G or T
N = any
from https://doi.org/10.1073/pnas.83.1.4 (see supplemental reference list.docx)
